# Supplementary material for: An Observation of a Very High Swelling of Bromovirus Members at Specific Ionic Strengths and pH
Source: MDPI journal article supplement (doi:10.3390/v15102046), 2023-10-04
Supplement: s1 [file s1]

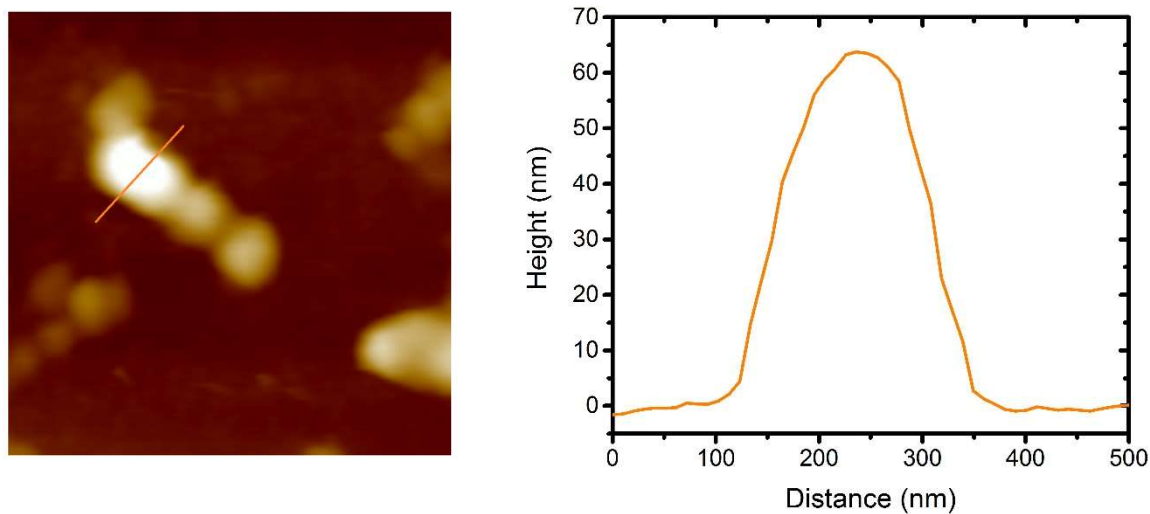

**Figure S1.** Height profile of the particle that looks very high. The profile is about 65 nm, and these high would correspond to two particles, one on top of the other.

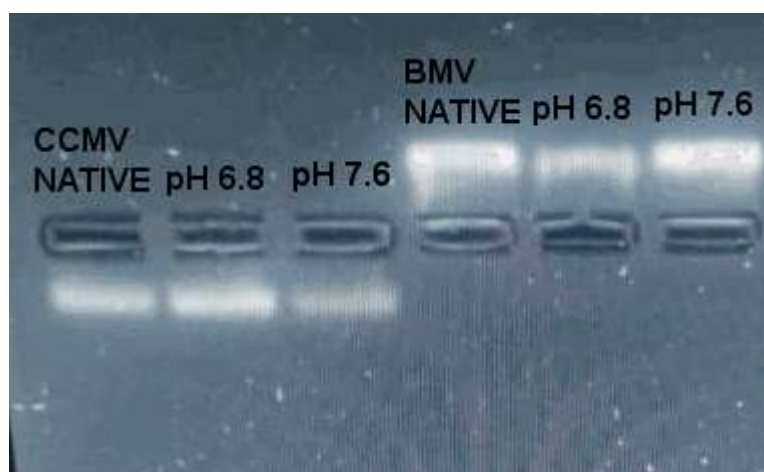

**Figure S2.** Retardation gel run with a buffer of 0.1 M sodium acetate and 0.001 M EDTA at pH 4.8. Samples loaded in lanes 2, 3, 5 and 6 are samples that were previously dialyzed for 24 h in phosphate buffer at pH 6.8 and 7.6 (points at which most swelling was observed) for CCMV and BMV, respectively. Lane 1 and lane 4 correspond to native CCMV and BMV in the highest stability buffer at pH 4.5. The running buffer of the retardation gel have a pH 4.8. The reason for the migration of BMV being to the opposite side than CCMV is due to its isoelectric point as can be observed with Ref. [34].

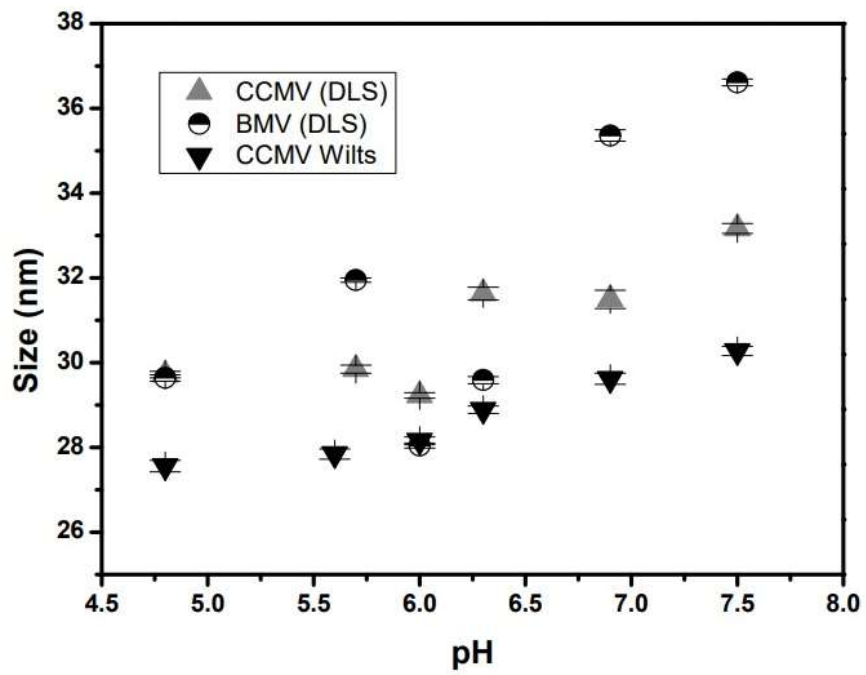

**Figure S3.** Comparative image between Wilts et al. [14] results performed by AFM and the results obtained with the same conditions in DLS for CCMV and BMV.
